# Supplementary material for: Effects of chain lengths and backbone chirality on the bone-targeting ability of poly(glutamic acid)s
Source: Royal Society of Chemistry journal article supplement (doi:10.1039/d4bm00437j), 2024-01-01
Supplement: d4bm00437j1.pdf [file d4bm00437j1.pdf]

Electronic Supplementary Information

**Effects of chain lengths and backbone chirality on the  
bone-targeting ability of poly(glutamic acid)s**

Jianglong Xia,<sup>‡a</sup> Wanying Wang,<sup>‡b</sup> Xiaoxiong Jin,<sup>b</sup> Jing Zhao,<sup>b</sup> Jiaoyu Chen,<sup>b</sup> Ning Li,<sup>b</sup>  
Shanshan Xiao,<sup>b</sup> Dongjun Lin,<sup>\*a</sup> and Ziyuan Song<sup>\*b</sup>

<sup>a</sup> Department of Haematology, The Seventh Affiliated Hospital of Sun Yat-sen University,  
Shenzhen 518107, China.

<sup>b</sup> Institute of Functional Nano & Soft Materials (FUNSOM), Jiangsu Key Laboratory for  
Carbon-Based Functional Materials and Devices, Soochow University, Suzhou 215123,  
China.

\*Corresponding email: zysong@suda.edu.cn; lindongjun@163.com

<sup>‡</sup> These authors contributed equally.

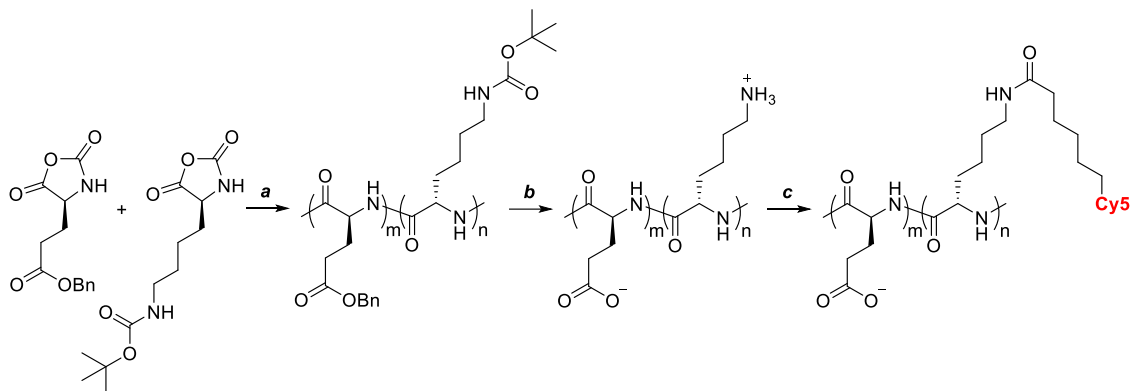

**Scheme S1.** Synthetic routes to Cy5-labelled poly(glutamic acid)s. *a.* *n*-hexylamine or  $\alpha$ -helical PBLG macroinitiators, DCM, rt. *b.* HBr/HOAc, TFA, 0 °C, 2 h. *c.* Cy5 NHS ester, NaHCO<sub>3</sub> (aq), rt, overnight.

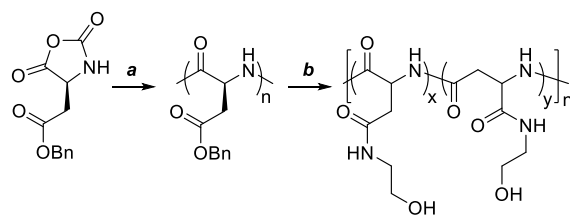

**Scheme S2.** Synthetic routes to PHEA. **a.** *n*-hexylamine, DCM/DMF (1:1, v/v), rt. **b.** ethanolamine (3 equiv.), DMF, 35 °C, 12 h.

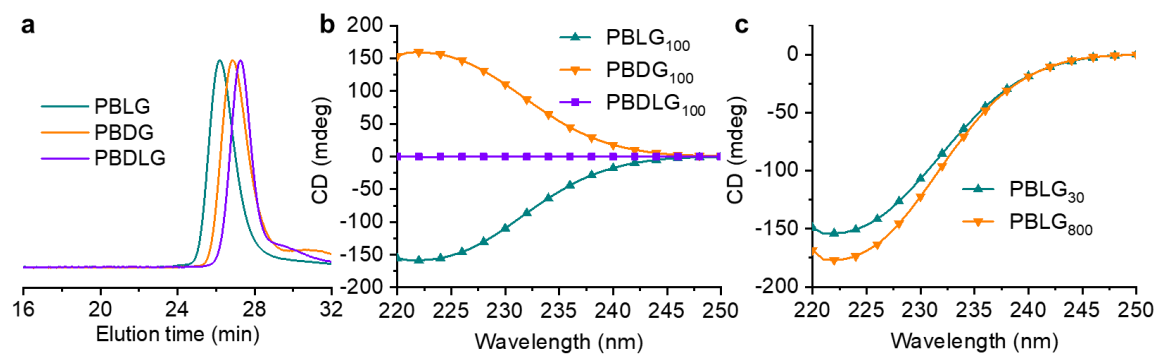

**Figure S1.** Characterization of poly( $\gamma$ -benzyl glutamate)s precursors before side-chain deprotection. (a) Normalized GPC-LS traces of poly( $\gamma$ -benzyl glutamate)s with different backbone chirality. (b, c) CD spectra of poly( $\gamma$ -benzyl glutamate)s in DCM with different backbone chirality (b) and chain lengths (c).

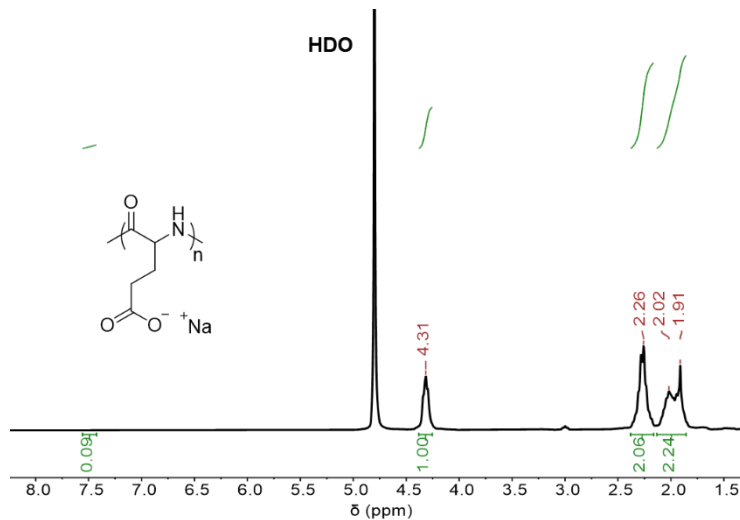

**Figure S2.**  $^1\text{H}$  NMR spectrum (300 MHz) of representative poly(glutamic acid) (PL100) after side-chain deprotection in  $\text{D}_2\text{O}$ .

The integral of the residue peak at 7.5 ppm was used for the calculation of side-chain deprotection efficiency.

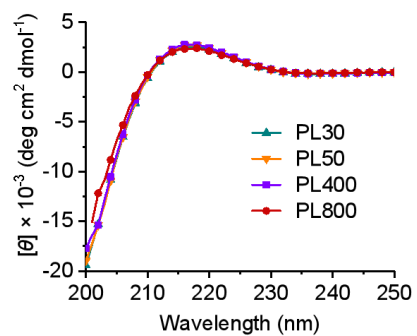

**Figure S3.** CD spectra of poly(L-glutamic acid)s in water at pH = 7.4 with different chain lengths.

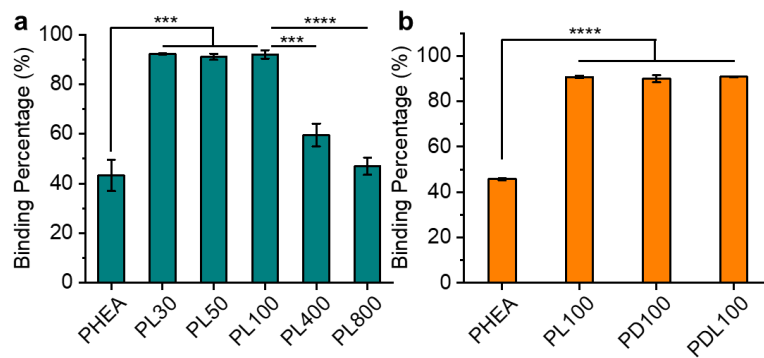

**Figure S4.** HA binding affinity of poly(glutamic acid)s with different chain lengths (a) and backbone chirality (b) after 30-min incubation ( $n = 3$ ). PHEA with neutral side-chain hydroxyl groups was used as a control. \*\*\* $p < 0.001$ , \*\*\*\* $p < 0.0001$ .

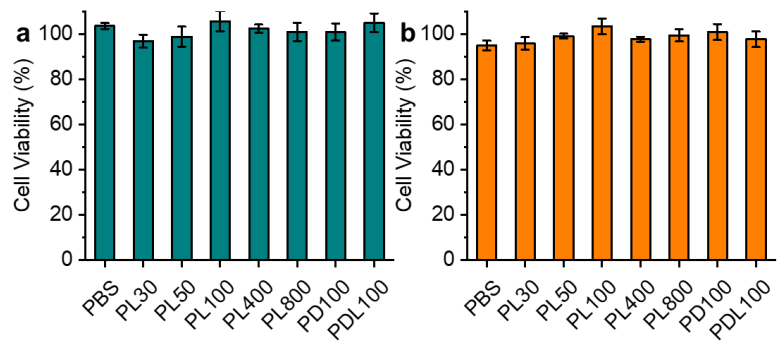

**Figure S5.** Cell viability of RAW 264.7 cells after 48-h incubation with various poly(glutamic acid)s at 0.01 (a) or 0.1 mg/mL (b) ( $n = 3$ ). Cells treated with PBS were used as control groups.



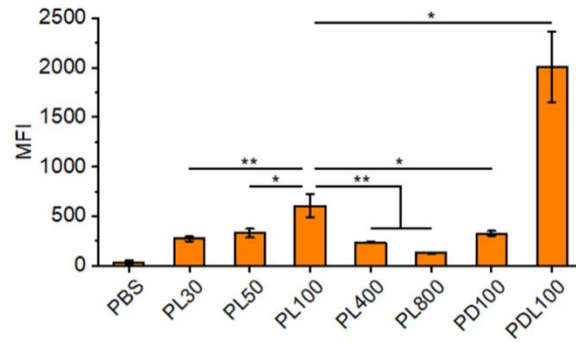

**Figure S6.** Mean fluorescent intensity of RAW 264.7 cells after 16-h incubation with various poly(glutamic acid)s. Cells treated with PBS were used as control groups ( $n = 3$ ).  
 $*p < 0.05$ ,  $**p < 0.01$ .

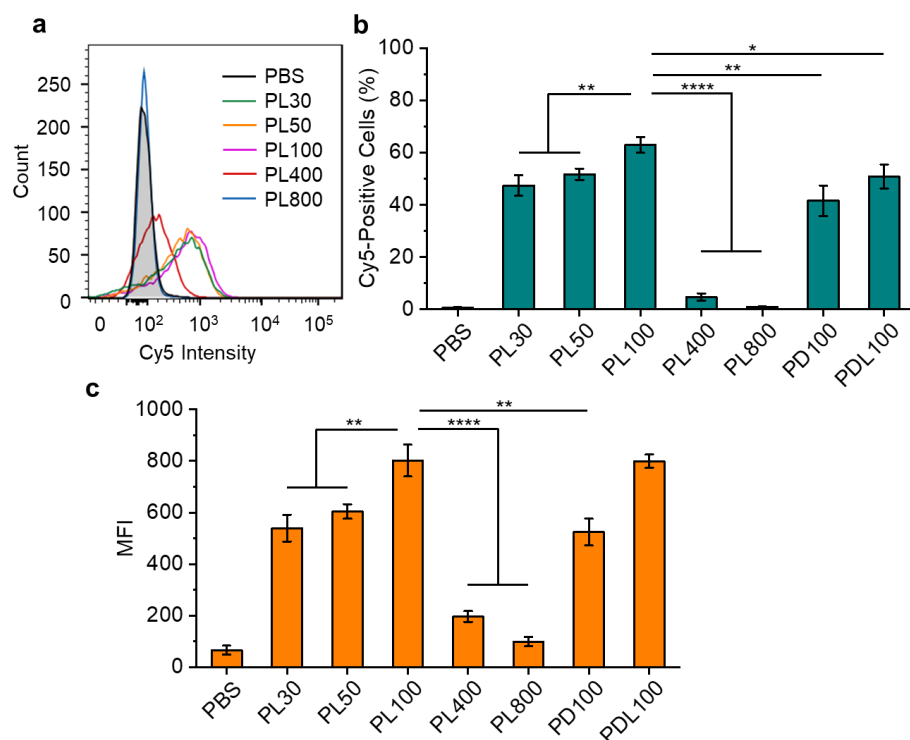

**Figure S7.** Cellular uptake of poly(glutamic acid)s by MV-4-11 cells. (a) Flow cytometric analysis of MV-4-11 cells after 16-h incubation with various poly(glutamic acid)s. (b) Cellular uptake efficiency of poly(glutamic acid)s by MV-4-11 cells ( $n = 3$ ). (c) Mean fluorescent intensity of MV-4-11 cells after 16-h incubation with various poly(glutamic acid)s ( $n = 3$ ). Cells treated with PBS were used as control groups. \* $p < 0.05$ , \*\* $p < 0.01$ , \*\*\*\* $p < 0.0001$ .

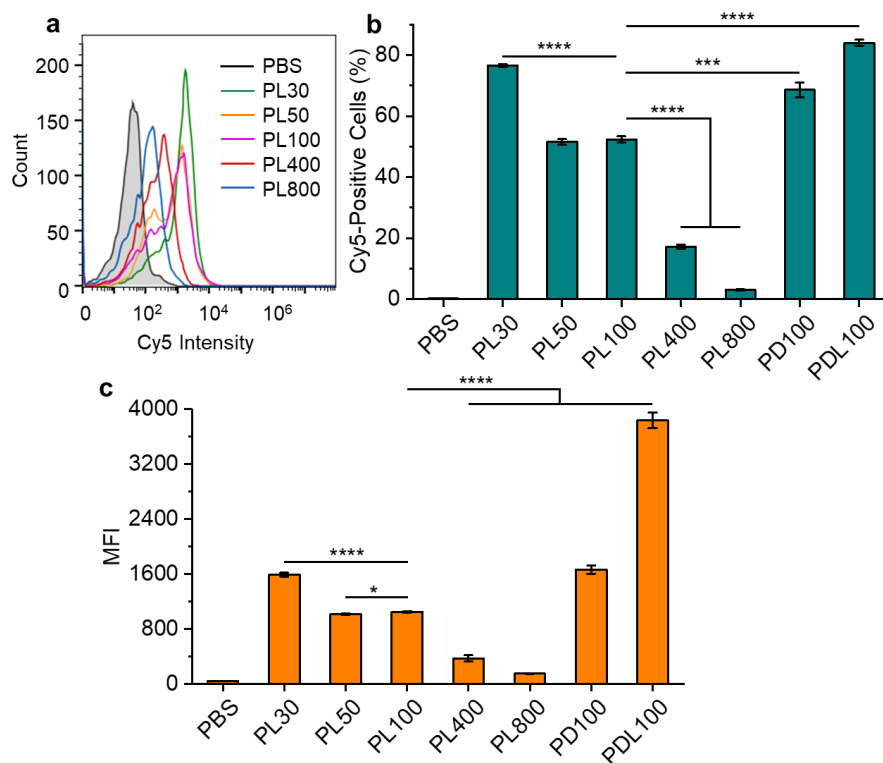

**Figure S8.** Cellular uptake of poly(glutamic acid)s by NIH/3T3 cells. (a) Flow cytometric analysis of NIH/3T3 cells after 16-h incubation with various poly(glutamic acid)s. (b) Cellular uptake efficiency of poly(glutamic acid)s by NIH/3T3 cells ( $n = 3$ ). (c) Mean fluorescent intensity of NIH/3T3 cells after 16-h incubation with various poly(glutamic acid)s ( $n = 3$ ). Cells treated with PBS were used as control groups.  $*p < 0.05$ ,  $***p < 0.001$ ,  $****p < 0.0001$ .

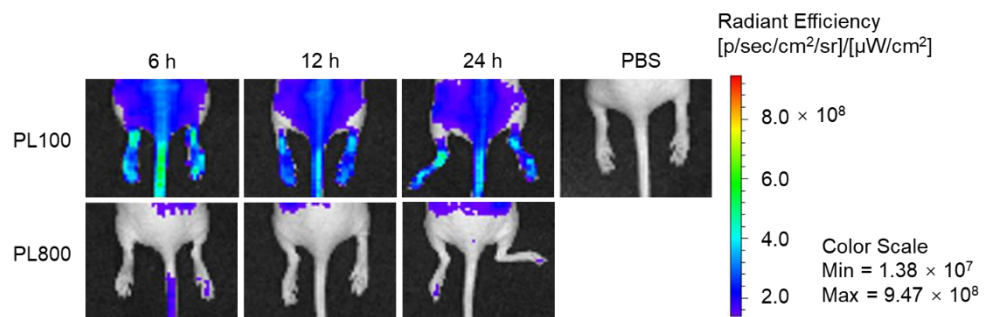

**Figure S9.** *In vivo* fluorescent imaging of mice at 6, 12, and 24 h post injection of Cy5-labelled PL100 and PL800. Mice treated with PBS were used as control groups.

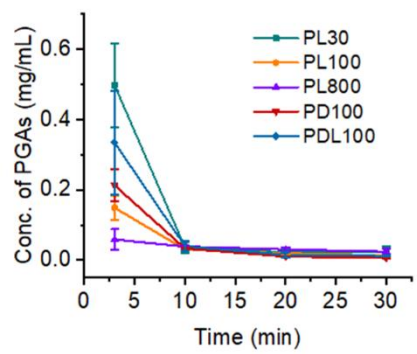

**Figure S10.** The change in plasma concentration of Cy5-labelled PGAs in mice over time ( $n = 3$ ).

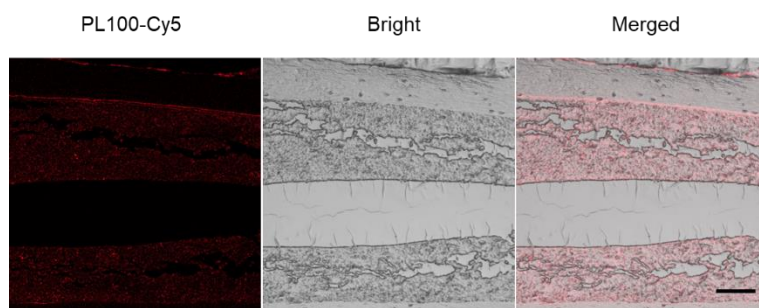

**Figure S11.** CLSM images of femur bone slices at 24 h post injection of Cy5-labelled PL100. Scale bar = 100  $\mu\text{m}$ .

## Supporting Tables

**Table S1.** The estimation of PGA size.

| Entry | PGAs   | DP <sup>a</sup> | $\langle r^2 \rangle_0^{1/2}$ (nm) <sup>b</sup> |
|-------|--------|-----------------|-------------------------------------------------|
| 1     | PL30   | 30              | 5.4                                             |
| 2     | PL50   | 63              | 7.9                                             |
| 3     | PL100  | 108             | 10.4                                            |
| 4     | PL400  | 515             | 22.7                                            |
| 5     | PL800  | 766             | 27.7                                            |
| 6     | PD100  | 83              | 9.1                                             |
| 7     | PDL100 | 70              | 8.4                                             |

<sup>a</sup>Degree of polymerization of PGAs calculated from molecular weights by GPC analysis.

<sup>b</sup>Estimated size of PGAs calculated through equation:  $\langle r^2 \rangle_0^{1/2} \sim (\text{DP})^{1/2}$ .
